# Supplementary material for: EZH2/H3K27Me3 and phosphorylated EZH2 predict chemotherapy response and prognosis in ovarian cancer
Source: PeerJ. 2020 May 12;8:e9052. doi: 10.7717/peerj.9052 (PMC7227641; doi:10.7717/peerj.9052)
Supplement: File S2 [file peerj-08-9052-s002.xlsx]

## Sheet: General characteristics
No.	Age	FIGO	Histology (Serous = 0, Others = 1)	Chemotherapy response (Resistanct = 1, Sensitive = 0)	Progression-free survival (months)	End point (Recurrent = 1)	Overall survival	End point (Death = 1)	EZH2	p-EZH2	H3K27Me3	p-akt
121	54	III	0	0	26	1	58	1	1	1	1	1
133	46	III	0	1	12	1	23	1	0	1	1	0
134	62	III	0	1	8	1	22	1	0	1	1	1
136	38	III	0	0	36	1	40	1	0	0	0	1
137	40	III～IV	0	1	4	1	4	1	1	1	1	1
149	50	III	0	1	11	1	52	1	1	1		1
155	48	III	0	0	18	1	22	1	1	0	0	0
174	41	III	0	1	10	1	13	1	1	1	1	0
238	48	III	0	0	22	1	53	1	0	1	1	1
239	38	III	0	0	54	1	68	0	1	0	1	1
256	57	III	0	0	63	0	63	0	0	0		0
259	59	III	0	0	15	1	18	1	0	0	0	0
268	56	III～IV	0	1	12	1	18	1	1	1	1	1
273	57	I～II	1	0	59	0	59	0	0	0	0	1
277	32	I～II	0	1	8	1	8	1	0	0	1	0
279	46	III-IV	0	0	23	1	57	1	0	1	1	1
286	58	III-IV	0	1	7	1	7	1	1	1	0	1
287	48	III-IV	0	1	11	1	13	1	0	0		1
289	59	I-II	1	0	51	0	51	0	0	0		0
292	49	IIIC	0	0	48	0	48	0	1	1		1
293	57	II	0	0	28	0	28	0	0	0	0	0
296	55	IV	1	0	29	0	29	0	1	1	1	1
300	54	IIIC	1	0	14	1	25	1	1	1		0
303	64	IIIC	0	1	9	1	13	1	1	1		0
304	39	I	1	0	45	0	45	0	0	1		0
305	51	IIIC	0	0	45	0	45	0	0	0		0
307	57	IV	0	0	31	1	45	0	0	0	0	0
309	53	II	0	0	39	1	44	0	0	0		0
310	47	IIIb	0	0	26	0	26	0	1	0		0
311	44	IV	0	0	19	1	43	0	0	1	1	0
313	44	II	1	0	36	1	43	0	1	1	1	0
314	50	II	0	0	25	0	25	0	1	1	1	0
315	50	III	0	1	6	1	13	1	1	1	1	0
316	62	IIIC	1	1	9	1	22	1	1	1	1	1
317	49	IIIC	0	1	7	1	34	1	1	1	1	1
318	63	IIIB	0	0	40	1	42	0	0	0	0	0
319	43	III	0	0	13	1	30	1	1	0	1	0
321	38	IIIC	0	0	41	0	41	0	1	1	1	1
322	62	IIIC	0	0	41	0	41	0	0	0	0	0
329	63	III	1	0	20	0	20	0	0	0	1	0
332	52	III-IV	1	0	31	0	31	0	1	1	1	1
334	56	IV	0	1	12	1	14	1	1	0	0	0
337	58	IIIC	1	0	14	1	20	1	1	0	0	0
338	50	IIIC	0	0	28	0	28	0	0	0	1	1
344	46	IV	0	1	11	1	27	0	0	0	1	0
345	44	IIIC	0	0	16	0	16	0	0	0	0	0
348	41	I～II	0	0	26	0	26	0	0	0	1	1
349	60	IIIC	0	0	26	0	26	0	0	0	0	0
350	58	IIC	0	0	23	0	23	0	0	0	1	0
351	50	III-IV	0	0	13	1	19	1	0	0	1	1
355	66	IIB	0	1	6	1	25	0	1	1	0	0
359	47	III-IV	1	1	8	1	8	1	1	1	0	0
360	63	III	0	0	24	0	24	0	1	1	0	1
363	53	IC	0	0	24	0	24	0	1	1	0	1
372	53	III	0	0	18	1	22	0	0	0	0	1
374	50	III	0	0	21	0	21	0	1	0	0	0
375	54	IIB	0	0	19	1	21	0	1	1	0	0
381	61	III	0	0	20	0	20	0	1	1	0	1
384	45	II	0	0	19	0	19	0	1	0	0	1
388	47	III	0		19	0	19	0	1	0	0	0
392	45	I-II	0	0	17	0	17	0	1	0	1	0
393	48	III-IV	0	0	17	0	17	0	1	1	1	0
399	61	III-IV	0	1	12	1	12	1	1	1	0	0
416	37	I-II	1	0	13	0	13	0	0	0	0	0
419	62	I-II	0	0	11	0	11	0	0	1	1	1

## Sheet: chi square-Fisher's exact tests
p-EZH2	cut off 6					EZH2	Cut off 6					p-Akt1	cut off 2	Median 2				H3K27Me3	Cut off 8.5	Median 8.5
Age						Age						Age						Age
1 = age ≥50; 0 = age <50	1 = pEZH2 high；0 = pEZH2 low	N		chi square P		1 = age ≥50; 0 = age <50	1 = EZH2 high 0 = EZH2 low	N		Fisher's exact P		1 = age ≥50; 0 = age <50	1 = pAkt1 high；0 = pAkt1 low			chi square P		1 = age ≥50; 0 = age <50	1 = H3K27Me3 high 0 = H3K27Me3 low			Fisher's exact P
1	1	19		0.883		1	1	20		1		1	1	16		0.213		1	1	13		0.057
1	0	19				1	0	18				1	0	22				1	0	18
0	1	13				0	1	15				0	1	16				0	1	16
0	0	14				0	0	12				0	0	11				0	0	7
Histology						Histology						Histology						Histology
Serous = 0, Others = 1				Fisher's exact P		Serous = 0, Others = 1				Fisher's exact P		Serous = 0, Others = 1				Fisher's exact P		Serous = 0, Others = 1				chi square P
1	1	8		0.215		1	1	7		0.761		1	1	4		0.747		1	1	5		0.598
1	0	4				1	0	5				1	0	8				1	0	4
0	1	24				0	1	28				0	1	23				0	1	24
0	0	29				0	0	25				0	0	30				0	0	21
FIGO Stage						FIGO Stage						FIGO Stage						FIGO Stage
1 = III-IV； 0 = I-II				Fisher's exact P		1 = III-IV；0= I-II				Fisher's exact P		1 = III-IV；0= I-II				Fisher's exact P		1 = III-IV；0= I-II				Fisher's exact
1	1	25		0.574		1	1	28		0.266		1	1	23		0.097		1	1	22		0.766
1	0	23				1	0	20				1	0	27				1	0	18
0	1	7				0	1	7				0	1	13				0	1	7
0	0	10				0	0	10				0	0	5				0	0	7
Tumor Type						Tumor Type						Tumor Type						Tumor Type
1 = TYPEII；0 = TYPEI				Fisher's exact P		1 = TYPEII；0 = TYPEI				Fisher's exact P		1 = TYPEII；0 = TYPEI				Fisher's exact P		1 = TYPEII；0 = TYPEI				Fisher's exact P
1	1	23		0.574		1	1	26		1		1	1	21		0.25		1	1	22		0.755
1	0	26				1	0	23				1	0	28				1	0	20
0	1	9				0	1	9				0	1	10				0	1	7
0	0	7				0	0	7				0	0	6				0	0	5
Chemotherapy Response						Chemotherapy Response						Chemotherapy Response						Chemotherapy Response
1 = Resistant； 0 = Sensitive				Fisher's exact P		1 = Resistant； 0 = Sensitive				Fisher's exact P		1 = Resistant； 0 = Sensitive				Fisher's exact P		1 = Resistant； 0 = Sensitive				Fisher's exact P
1	1	14		0.011		1	1	13		0.053		1	1	8		0.404		1	1	10		0.363
1	0	4				1	0	5				1	0	10				1	0	5
0	1	18				0	1	20				0	1	27				0	1	19
0	0	28				0	0	26				0	0	19				0	0	19
