# Supplementary material for: EZH2/H3K27Me3 and phosphorylated EZH2 predict chemotherapy response and prognosis in ovarian cancer
Source: PeerJ journal article supplement (doi:10.7717/peerj.9052), 2020-05-12

**IgG Negative**

**Positive**

**EZH2**

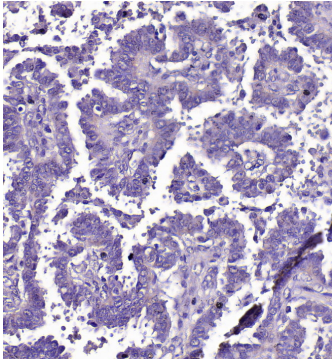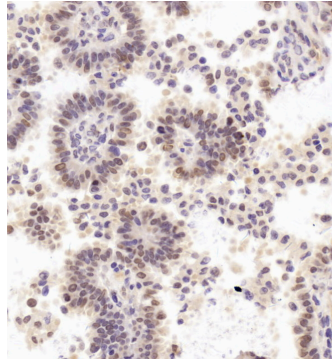

**p-EZH2**

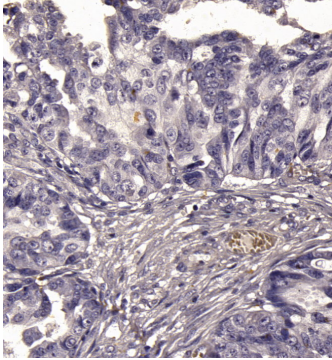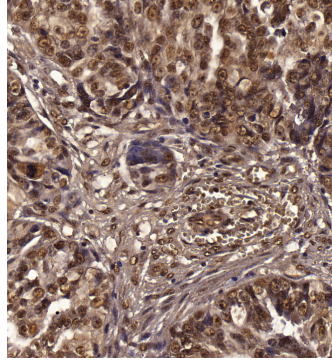

**H3K27me3**

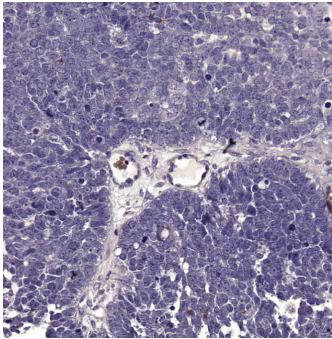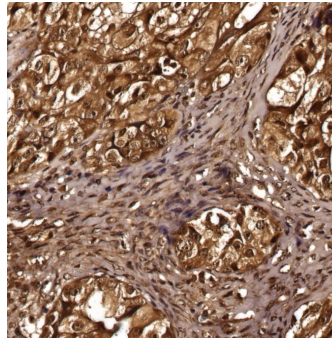

**p-Akt1**

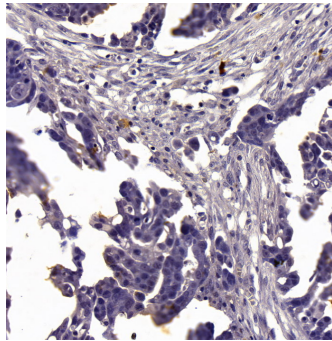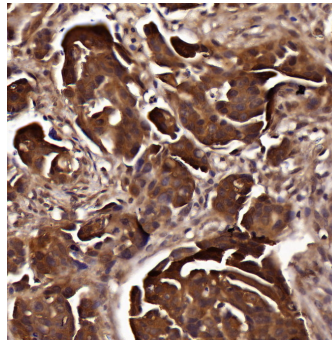

Supplement: Supplemental_file_3.pdf [file Supplemental_file_3.pdf]
